# Supplementary material
Source: publisher figshare collection journal article supplement (https://acs.figshare.com/ndownloader/files/4639648)
Supplement: Supplementary file 1 [file 4639648]

*Supporting Information File*

**A Mixed Valent Dodecanuclear Vanadium Cluster  
Encapsulating Chloride Anions and its Reaction to form a  
“Bowl” Shaped Cluster**

**Sanjit Konar,\* and Abraham Clearfield\***

Department of Chemistry, Texas A&M University, College Station, TX 77842-3012

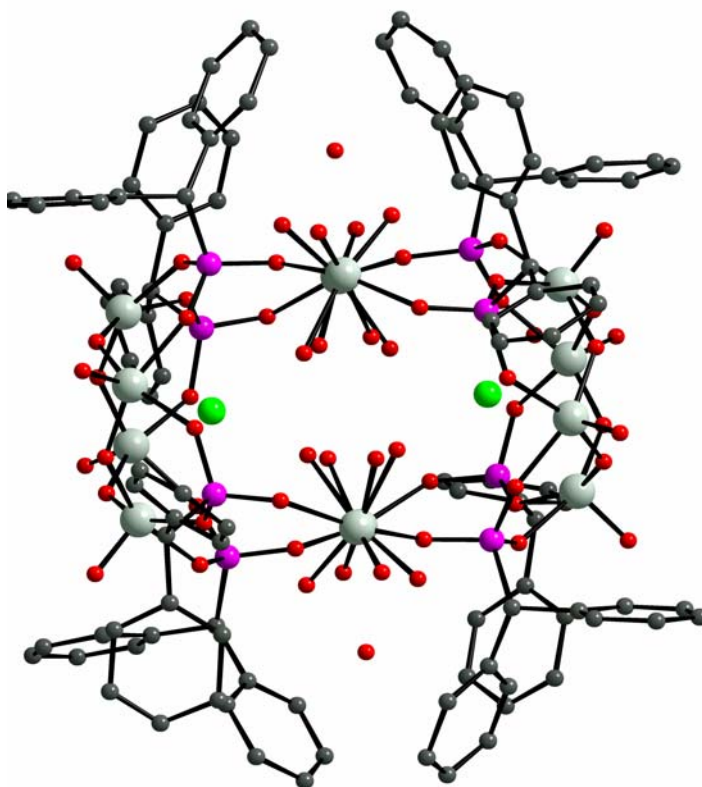

**Figure S1.** Molecular structure of **1**. Color Code: red, oxygen; dark-grey, carbon; pink, phosphorus; light-grey, V; green, chloride. Hydrogen atoms are removed for clarity.

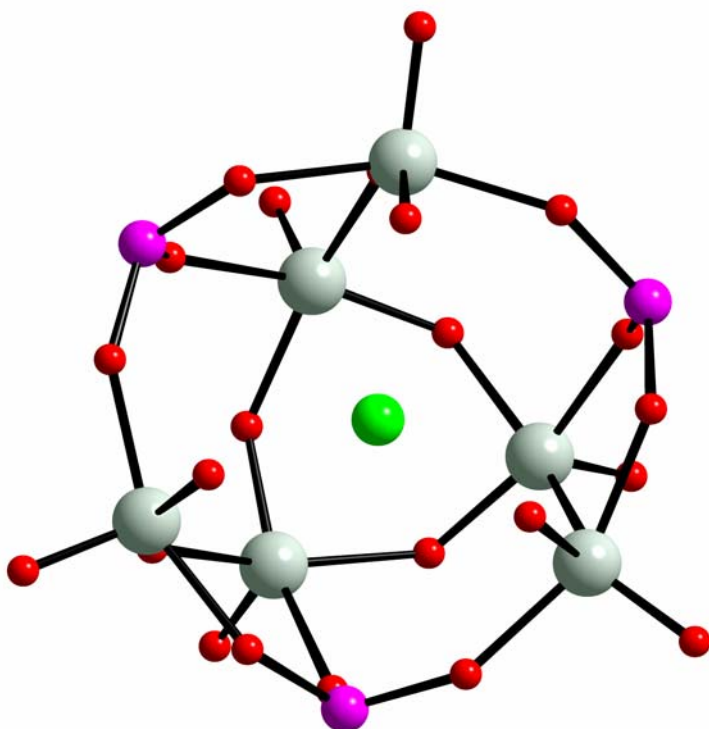

**Figure S2.** Core structure of hexavanadyl subunit of **2** along *b* axis, illustrating the location of encapsulated chloride anion. Color Code: red, oxygen; pink, phosphorus; light-grey, V; green, chloride.

**Table S1.** Bond Valance Sum Calculation for **1** and **2**.

| <b>1</b>      |            |                                         | <b>2</b>      |            |                                         |
|---------------|------------|-----------------------------------------|---------------|------------|-----------------------------------------|
| <b>V Site</b> | <b>BVS</b> | <b>Assigned<br/>Oxidation<br/>State</b> | <b>V Site</b> | <b>BVS</b> | <b>Assigned<br/>Oxidation<br/>State</b> |
| V1            | 5.37       | 5                                       | V1            | 5.46       | 5                                       |
| V2            | 5.13       | 5                                       | V2            | 5.44       | 5                                       |
| V3            | 5.21       | 5                                       |               |            |                                         |
| V4            | 4.07       | 4                                       |               |            |                                         |
| V5            | 4.14       | 4                                       |               |            |                                         |
| V6            | 4.14       | 4                                       |               |            |                                         |
| V7            | 5.27       | 5                                       |               |            |                                         |
| V8            | 5.18       | 5                                       |               |            |                                         |
| V9            | 5.22       | 5                                       |               |            |                                         |
| V10           | 4.13       | 4                                       |               |            |                                         |
| V11           | 5.21       | 5                                       |               |            |                                         |
| V12           | 5.26       | 5                                       |               |            |                                         |

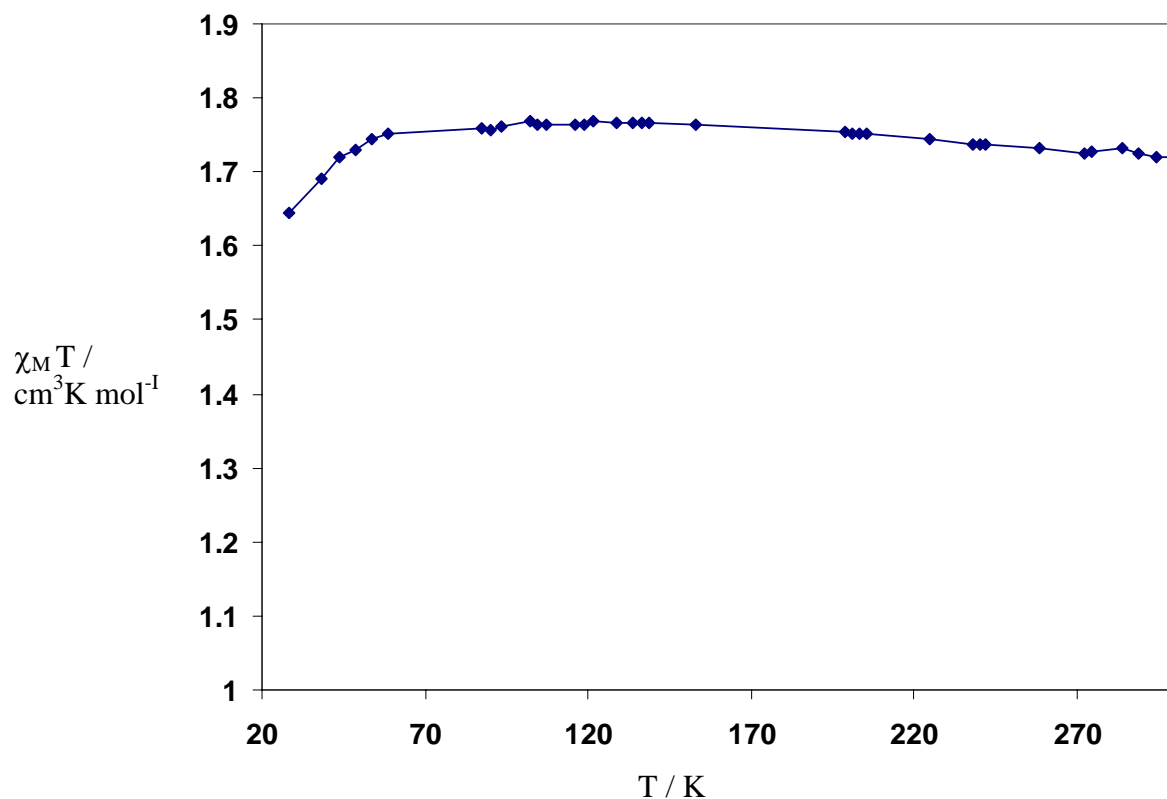

**Figure S3.** a) Temperature dependence of  $\chi_M T$  for a powder sample of **1** in the temperature range 20-300K.

The room temperature  $\chi_M T$  value of the compound is 1.71 which is close to the calculated value  $1.5(g=2)$  for four isolated vanadium(IV) centers. This confirms the mixed valent (+5 and +4) nature of the compound.

Compound **2** is diamagnetic and this confirms the +5 oxidation state of both of the vanadiums.
